# Supplementary material for: Genome-wide analyses of the NAC transcription factor gene family in Acer palmatum provide valuable insights into the natural process of leaf senescence
Source: PeerJ. 2025 Jan 13;13:e18817. doi: 10.7717/peerj.18817 (PMC11737331; doi:10.7717/peerj.18817)
Supplement: Supplemental Information 2 [file peerj-13-18817-s002.xlsx]

## Sheet: Sheet1
Supplemental Table S2.qRT-PCR quantitative data
Season	Summer1	Summer2	Summer3	Autumn1	Autumn2	Autumn3
ApNAC06	4.88114	5.36926	4.39303	19.5246	21.0246	18.0246
ApNAC41	3.77949	4.15744	3.40154	15.118	16.318	13.918
ApNAC91	2.9645	3.26095	2.66805	11.858	12.758	10.958
ApNAC02	2.67066	2.93773	2.4036	10.6827	11.5827	9.78265
ApNAC83	2.41246	2.65371	2.17122	9.64985	10.5999	8.69985
ApNAC48	2.39367	2.63303	2.1543	9.57467	10.6747	8.47467
ApNAC51	2.21023	2.43125	1.98921	8.84092	9.62092	8.06092
ApNAC04	1.95465	2.15011	1.75918	7.81858	8.31858	7.31858
ApNAC05	1.86439	2.05083	1.67795	7.45755	8.65755	6.25755
ApNAC100	1.79081	1.96989	1.61173	7.16323	8.11323	6.21323
ApNAC80	2.88688	3.17557	2.5982	-11.5475	-12.4475	-10.6475
ApNAC116	1.88285	2.07113	1.69456	-7.53138	-7.53138	-7.53138
ApNAC15	2.17856	2.39642	1.96071	-8.71425	-9.66425	-7.76425
ApNAC79	2.41396	2.65535	2.17256	-9.65583	-10.7558	-8.55583
ApNAC76	2.74145	3.01559	2.4673	-10.9658	-11.7458	-10.1858
