# Supplementary material for: Genome-wide analyses of the NAC transcription factor gene family in Acer palmatum provide valuable insights into the natural process of leaf senescence
Source: PeerJ. 2025 Jan 13;13:e18817. doi: 10.7717/peerj.18817 (PMC11737331; doi:10.7717/peerj.18817)
Supplement: Supplemental Information 6 [file peerj-13-18817-s006.xlsx]

## Sheet: Sheet1
Supplementary Table S6.Cis-acting regulatory element (CARE) analysis of ApNACs
	Box 4	G-box	G-Box	GT1-motif	TCT-motif	I-box	GATA-motif	TCCC-motif	MRE	ACE	ABRE	CGTCA-motif	TGACG-motif	TCA-element	GARE-motif	TGA-element	P-box	TATC-box	LTR	MBS	TC-rich repeats	circadian
ApNAC01	4	2	1	2	0	0	1	1	1	2	3	1	1	0	0	0	0	0	1	0	0	0
ApNAC02	1	5	0	3	0	1	0	0	0	2	5	1	1	0	2	0	1	0	2	1	1	0
ApNAC03	6	0	6	2	1	0	0	0	2	1	6	2	2	0	3	0	1	0	0	0	1	1
ApNAC04	2	4	0	0	2	0	2	2	2	0	3	3	3	0	0	0	0	1	0	1	0	0
ApNAC05	2	4	0	0	2	0	2	2	1	0	3	2	2	0	0	0	0	1	0	1	0	0
ApNAC06	2	3	1	1	3	0	1	0	1	1	3	1	1	1	0	0	1	0	0	5	0	0
ApNAC07	4	13	9	0	2	1	2	0	1	2	26	2	2	1	3	2	0	1	2	1	0	0
ApNAC08	2	4	4	3	0	4	2	1	4	1	9	5	5	3	0	0	4	0	1	0	0	0
ApNAC09	7	5	2	3	2	1	0	1	0	0	7	3	3	0	0	0	0	0	0	2	2	0
ApNAC10	2	3	1	0	1	1	0	1	0	0	3	1	1	0	2	1	0	0	1	0	1	0
ApNAC100	3	4	0	0	1	0	1	1	1	0	2	2	2	0	0	0	1	0	1	2	0	1
ApNAC101	4	0	2	2	1	0	0	2	0	1	2	4	4	2	1	1	1	0	0	1	3	0
ApNAC102	7	2	2	2	2	0	0	0	0	0	2	1	1	2	1	1	0	1	0	1	0	0
ApNAC103	6	6	3	1	1	2	1	0	0	0	10	2	2	1	1	0	2	0	1	2	0	0
ApNAC104	3	2	0	1	1	0	0	0	1	1	3	1	1	0	1	1	0	1	2	2	2	1
ApNAC105	2	1	1	0	1	0	2	0	0	0	1	4	4	4	1	0	0	0	1	1	0	0
ApNAC106	7	2	1	0	2	1	0	1	1	0	2	3	3	1	0	1	0	0	3	2	0	0
ApNAC107	0	0	3	1	1	0	1	0	0	0	3	3	3	2	1	0	0	0	0	0	4	1
ApNAC108	4	2	1	6	1	0	0	0	1	0	4	3	3	0	3	0	1	1	1	3	2	1
ApNAC109	2	2	2	1	1	0	1	0	0	0	3	3	3	1	0	0	0	0	1	1	4	1
ApNAC11	4	6	2	1	1	0	0	1	0	1	9	3	3	2	0	0	2	0	1	4	1	0
ApNAC110	0	0	0	2	0	0	1	0	1	0	0	2	2	3	1	0	2	0	2	1	0	0
ApNAC111	7	2	1	4	1	0	0	0	1	0	4	2	2	0	1	1	1	2	1	1	2	0
ApNAC112	3	1	0	4	1	3	1	1	1	0	1	3	3	1	2	2	1	1	1	3	2	0
ApNAC113	5	0	0	0	3	1	1	0	2	0	1	0	0	0	0	0	1	0	0	1	2	0
ApNAC114	1	6	3	1	0	0	2	0	0	0	10	7	7	0	0	0	0	1	1	3	0	0
ApNAC115	5	2	1	1	1	0	0	4	0	1	2	1	1	1	2	3	0	1	0	2	1	1
ApNAC116	8	4	2	0	3	0	0	2	0	0	4	2	2	0	0	1	0	0	0	1	0	0
ApNAC12	4	3	3	0	3	1	0	0	0	0	5	1	1	0	2	0	0	1	1	2	0	0
ApNAC13	2	4	1	1	0	0	1	0	1	0	4	1	1	2	0	0	1	1	0	2	2	1
ApNAC14	5	3	2	2	1	0	0	0	0	1	4	1	1	2	0	0	0	0	0	1	2	0
ApNAC15	6	2	1	3	0	1	1	1	0	0	2	4	4	1	0	0	0	1	0	1	1	1
ApNAC16	10	1	0	4	0	0	1	0	0	0	0	5	5	0	0	0	0	0	3	1	1	0
ApNAC17	2	2	0	3	1	0	0	1	0	0	2	3	3	0	0	0	0	0	2	0	0	0
ApNAC18	2	13	5	7	1	0	0	2	0	0	5	0	0	1	1	2	1	0	5	3	1	0
ApNAC19	4	1	0	3	2	1	1	2	0	0	0	4	4	0	1	0	1	0	0	1	1	1
ApNAC20	5	1	0	3	2	0	0	1	0	0	0	3	3	0	1	0	0	0	0	1	1	1
ApNAC21	8	1	0	0	0	0	0	1	1	0	2	1	1	1	1	1	0	0	0	2	0	0
ApNAC22	4	5	3	2	2	0	1	1	0	1	10	3	3	3	0	2	1	0	2	1	1	0
ApNAC23	7	0	0	0	1	0	0	1	2	0	2	0	0	1	0	1	0	0	2	1	0	0
ApNAC24	1	1	1	1	0	2	1	1	0	0	2	1	1	1	2	3	1	0	1	0	0	0
ApNAC25	0	3	0	1	0	0	4	0	1	0	1	2	2	0	0	1	1	0	1	1	0	1
ApNAC26	5	0	1	0	1	1	2	0	0	0	1	2	2	2	0	1	0	1	2	1	0	0
ApNAC27	3	3	1	1	1	1	0	0	0	0	4	4	4	0	0	0	0	0	0	1	0	0
ApNAC28	8	2	0	7	2	0	0	0	1	0	2	0	0	0	1	0	0	1	1	2	0	0
ApNAC29	4	2	1	0	2	1	0	1	0	0	4	3	3	1	1	1	0	0	1	3	1	0
ApNAC30	3	3	1	2	1	1	1	0	0	0	3	0	0	0	0	0	1	0	3	3	1	1
ApNAC31	11	1	0	0	1	0	0	0	1	0	1	3	3	3	1	0	0	0	0	1	2	0
ApNAC32	8	1	0	1	0	0	0	0	0	0	1	4	4	1	0	0	1	1	0	0	0	0
ApNAC33	6	1	1	4	0	2	0	0	0	0	3	4	4	2	0	0	0	0	0	1	0	0
ApNAC34	3	1	0	2	1	0	0	0	0	1	2	6	6	3	2	1	0	0	1	1	0	0
ApNAC35	6	6	1	2	1	0	0	0	0	0	3	2	2	3	0	0	1	1	1	4	0	0
ApNAC36	4	2	0	1	0	0	1	1	0	0	3	4	4	0	1	1	1	0	2	2	0	0
ApNAC37	3	3	0	0	2	0	1	0	0	1	3	0	0	1	1	1	3	1	2	0	1	0
ApNAC38	6	3	2	1	2	0	1	2	1	0	5	1	1	0	0	2	2	1	1	2	1	0
ApNAC39	5	2	2	0	1	0	1	1	0	0	5	2	2	2	0	0	2	0	0	3	0	1
ApNAC40	1	2	1	1	0	0	1	1	1	0	3	2	2	0	0	1	0	1	1	0	1	0
ApNAC41	6	2	1	1	0	0	0	0	1	0	2	1	1	2	1	1	0	0	0	0	1	1
ApNAC42	1	2	2	0	2	1	0	0	0	1	4	1	1	1	2	0	2	0	1	0	1	0
ApNAC43	2	0	0	2	4	0	0	1	0	0	2	1	1	2	0	1	0	0	1	1	2	0
ApNAC44	2	0	0	1	1	0	0	1	0	0	0	2	2	0	0	0	0	0	2	1	1	0
ApNAC45	1	1	0	1	0	0	1	1	1	1	0	1	1	0	1	1	0	0	0	2	1	1
ApNAC46	1	2	0	0	0	0	1	0	0	0	3	0	0	1	0	0	2	1	4	1	1	0
ApNAC47	1	2	0	0	1	2	2	0	0	2	3	1	1	1	0	1	2	1	3	3	0	0
ApNAC48	4	6	2	3	1	0	0	0	0	0	3	3	3	1	1	1	0	0	0	1	3	0
ApNAC49	6	2	2	0	2	1	1	1	1	0	3	0	0	1	1	0	1	0	2	0	0	0
ApNAC50	4	2	2	0	3	0	1	0	2	0	4	3	3	1	1	0	1	1	2	1	2	0
ApNAC51	2	1	0	3	2	0	0	1	0	0	0	3	3	0	0	1	0	0	1	0	2	0
ApNAC52	4	2	2	2	4	3	1	0	5	0	2	2	2	1	0	0	0	0	1	2	2	0
ApNAC53	3	4	2	1	2	0	1	0	0	1	5	0	0	0	1	0	2	2	2	5	0	1
ApNAC54	2	3	2	2	0	2	0	1	1	0	5	2	2	0	0	1	0	0	0	1	0	0
ApNAC55	2	4	4	1	0	0	1	0	0	0	9	0	0	1	0	1	0	0	3	1	0	1
ApNAC56	2	4	1	2	1	0	0	0	0	0	6	1	1	0	0	1	1	0	2	2	0	1
ApNAC57	2	1	0	1	0	0	1	0	0	0	1	5	5	0	0	1	0	0	0	5	1	0
ApNAC58	5	3	2	3	0	0	0	0	0	0	5	2	2	1	0	3	0	0	0	2	0	2
ApNAC59	3	8	3	0	2	2	0	0	1	0	10	4	4	2	0	1	0	0	2	2	0	1
ApNAC60	3	3	0	1	0	0	0	0	1	0	4	4	4	1	0	1	0	0	1	0	0	1
ApNAC61	6	4	0	1	3	0	1	0	1	0	3	2	2	0	0	0	0	0	0	1	1	0
ApNAC62	4	5	2	0	1	1	0	1	0	0	4	2	2	1	0	0	0	0	1	2	0	0
ApNAC63	6	1	2	0	2	0	1	0	3	0	2	0	0	2	3	1	1	0	0	2	0	0
ApNAC64	6	14	6	1	0	0	0	0	1	0	15	5	5	2	1	1	1	0	0	3	0	0
ApNAC65	1	4	2	5	1	0	1	0	0	0	7	5	5	1	1	0	0	1	3	2	0	1
ApNAC66	4	2	0	1	0	1	1	0	2	1	1	2	2	0	1	0	0	1	0	1	0	0
ApNAC67	1	2	1	1	0	0	1	0	0	0	3	1	1	3	0	2	0	0	2	2	0	0
ApNAC68	1	7	3	8	3	1	2	0	0	1	9	2	2	1	4	2	1	0	4	5	0	0
ApNAC69	2	1	1	0	1	1	1	1	0	0	3	6	6	0	0	0	0	0	1	3	1	0
ApNAC70	1	1	0	0	4	2	0	0	0	0	1	2	2	0	0	0	1	0	0	4	0	0
ApNAC71	1	2	1	2	1	2	0	0	0	0	3	2	2	1	1	4	0	0	1	3	0	1
ApNAC72	5	17	7	1	1	2	1	1	0	0	27	4	4	0	0	0	1	0	1	2	1	0
ApNAC73	3	3	1	2	1	1	0	4	0	1	3	0	0	1	2	0	0	0	1	1	2	0
ApNAC74	2	4	2	1	5	2	0	0	0	0	6	2	2	3	0	1	0	1	1	1	3	0
ApNAC75	2	1	0	1	1	0	0	0	2	0	2	9	9	2	0	2	0	0	1	1	1	1
ApNAC76	6	2	0	0	3	0	1	0	0	0	2	2	2	0	0	0	0	0	1	5	1	0
ApNAC77	0	8	2	3	0	2	0	0	1	0	6	4	4	0	1	1	0	0	2	1	0	0
ApNAC78	0	8	2	3	1	2	0	0	0	1	6	7	7	0	1	0	0	0	2	1	0	0
ApNAC79	6	4	0	0	2	0	0	0	1	1	3	6	6	2	0	0	1	0	2	1	1	1
ApNAC80	0	0	0	1	0	0	0	0	1	0	0	3	3	0	0	0	1	1	1	0	0	0
ApNAC81	3	0	2	0	2	1	0	0	0	0	5	2	2	1	0	1	0	0	1	2	1	0
ApNAC82	4	5	2	1	0	0	2	2	0	1	7	4	4	0	1	2	2	0	1	2	1	0
ApNAC83	4	1	1	2	1	0	0	0	1	0	2	2	2	0	1	0	0	1	0	0	0	0
ApNAC84	2	0	1	0	2	1	1	0	0	0	1	0	0	3	0	1	2	0	0	1	0	0
ApNAC85	8	0	1	1	0	0	2	1	0	0	1	4	4	0	3	0	0	0	2	0	0	1
ApNAC86	4	3	1	0	0	1	0	1	0	0	3	1	1	1	0	0	1	0	1	1	1	0
ApNAC87	2	2	0	2	2	2	1	1	0	0	1	2	2	0	0	0	2	0	0	4	2	0
ApNAC88	5	2	0	4	1	1	0	0	0	1	2	2	2	2	0	0	0	1	0	1	2	0
ApNAC89	1	6	2	0	0	1	0	0	1	0	8	3	3	0	0	1	0	1	0	0	1	0
ApNAC90	8	1	1	2	1	2	0	1	0	0	2	2	2	0	0	0	0	0	0	3	2	0
ApNAC91	5	0	1	0	1	2	0	1	1	0	1	1	1	0	0	0	0	0	1	2	1	0
ApNAC92	2	5	1	2	2	1	0	0	1	0	4	1	1	1	5	0	3	0	1	3	2	0
ApNAC93	3	1	0	2	1	0	0	0	0	0	1	1	1	1	2	0	1	0	0	2	0	2
ApNAC94	7	4	0	0	0	1	0	2	1	0	1	2	2	0	1	0	0	0	0	0	1	1
ApNAC95	4	0	1	0	1	2	0	1	0	0	2	0	0	1	0	0	0	0	0	1	0	0
ApNAC96	7	10	5	0	1	0	2	1	2	0	13	6	6	1	0	1	0	0	1	1	0	1
ApNAC97	3	6	1	2	1	0	1	0	3	0	5	5	5	2	2	2	0	1	0	3	0	0
ApNAC98	8	2	1	0	1	0	0	0	0	0	1	1	1	1	1	2	0	1	3	1	0	0
ApNAC99	3	3	1	1	1	0	0	0	1	0	3	3	3	2	0	2	0	2	3	3	0	0
